# Supplementary material
Source: Springer Nature journal article supplement (https://www.springermedizin.de/resource/supplementary/12936_2007_395_MOESM2_ESM.pdf/9547712)

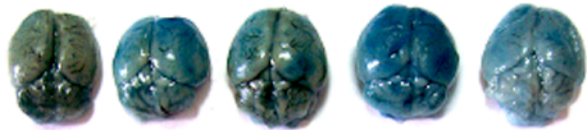

*P. berghei*

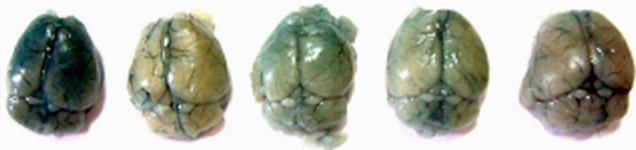

*P. berghei*  
+  
*T. cruzi*

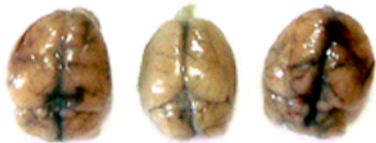

Normal

Supplement: MOESM2 [file 9547712]
